# Supplementary material
Source: publisher figshare collection journal article supplement (https://asha.figshare.com/articles/dataset/_/26972425)
Supplement: Supplementary file 1 [file 1]

**Supplemental Material S2.** Intelligibility scores for each participant for pre-treatment and post-treatment sampling times for both scoring methods for Rater 4.

| <b>Participant #</b> | <b>Pre-Treatment Transcription</b> | <b>Pre-Treatment Multiple Choice</b> | <b>Post-Treatment Transcription</b> | <b>Post-Treatment Multiple Choice</b> |
|----------------------|------------------------------------|--------------------------------------|-------------------------------------|---------------------------------------|
| P1                   | 66                                 | 82                                   | 90                                  | 100                                   |
| P2                   | 6                                  | 40                                   | 10                                  | 46                                    |
| P4                   | 54                                 | 82                                   | 64                                  | 96                                    |
| P5                   | 36                                 | 64                                   | 56                                  | 80                                    |
| P6                   | 78                                 | 92                                   | 88                                  | 98                                    |
| P7                   | 84                                 | 94                                   | 82                                  | 92                                    |
| P8                   | 94                                 | 100                                  | 86                                  | 94                                    |
| P9                   | 8                                  | 30                                   | 36                                  | 72                                    |
| P11                  | 41                                 | 65                                   | 62                                  | 82                                    |
| P12                  | 66                                 | 82                                   | 74                                  | 86                                    |
| P13                  | 36                                 | 68                                   | 48                                  | 76                                    |
| P14                  | 52                                 | 80                                   | 52                                  | 82                                    |
| P15                  | 58                                 | 80                                   | 64                                  | 88                                    |
| P16                  | 90                                 | 94                                   | 96                                  | 100                                   |
| P18                  | 88                                 | 96                                   | 94                                  | 100                                   |
| P19                  | 4                                  | 16                                   | 10                                  | 22                                    |
| P20                  | 6                                  | 32                                   | 4                                   | 32                                    |
| P23                  | 78                                 | 90                                   | 86                                  | 98                                    |
| P25                  | 84                                 | 96                                   | 92                                  | 96                                    |
| P26                  | 0                                  | 12                                   | 0                                   | 18                                    |
| P27                  | 40                                 | 68                                   | 45                                  | 65                                    |
| P28                  | 0                                  | 14                                   | 0                                   | 21                                    |
