# Supplementary material
Source: publisher figshare collection journal article supplement (https://asha.figshare.com/articles/dataset/_/26972425)
Supplement: Supplementary file 2 [file 1]

**Supplemental Material S1.** Intelligibility scores for each participant by post-treatment sampling time and scoring method for Raters 1, 2, and 3.

**Post-treatment Scores for Each Participant for Each Rater**

Scores for Each Participant: Rater 1

| <b>Participant #</b> | <b>Time 1 Transcription</b> | <b>Time 1 Multiple Choice</b> | <b>Time 2 Transcription</b> | <b>Time 2 Multiple Choice</b> |
|----------------------|-----------------------------|-------------------------------|-----------------------------|-------------------------------|
| P1                   | 94                          | 100                           | 90                          | 98                            |
| P2                   | 18                          | 50                            | 22                          | 56                            |
| P4                   | 74                          | 94                            | 68                          | 88                            |
| P5                   | 64                          | 76                            | 68                          | 80                            |
| P6                   | 88                          | 92                            | 94                          | 94                            |
| P7                   | 88                          | 92                            | 88                          | 96                            |
| P8                   | 96                          | 96                            | 98                          | 100                           |
| P9                   | 58                          | 72                            | 62                          | 76                            |
| P11                  | 72                          | 88                            | 76                          | 86                            |
| P12                  | 70                          | 80                            | 52                          | 70                            |
| P13                  | 60                          | 76                            | 48                          | 62                            |
| P14                  | 62                          | 84                            | 72                          | 86                            |
| P15                  | 60                          | 72                            | 76                          | 88                            |
| P16                  | 94                          | 100                           | 96                          | 98                            |
| P18                  | 94                          | 94                            | 96                          | 100                           |
| P19                  | 6                           | 26                            | 12                          | 28                            |
| P20                  | 12                          | 38                            | 6                           | 34                            |
| P23                  | 84                          | 94                            | 90                          | 96                            |
| P25                  | 94                          | 98                            | 98                          | 98                            |
| P26                  | 2                           | 40                            | 0                           | 28                            |
| P27                  | 58                          | 70                            | 64                          | 88                            |
| P28                  | 2                           | 6                             | 0                           | 20                            |

Scores for Each Participant: Rater 2

| <b>Participant #</b> | <b>Time 1 Transcription</b> | <b>Time 1 Multiple Choice</b> | <b>Time 2 Transcription</b> | <b>Time 2 Multiple Choice</b> |
|----------------------|-----------------------------|-------------------------------|-----------------------------|-------------------------------|
| P1                   | 90                          | 100                           | 84                          | 96                            |
| P2                   | 12                          | 44                            | 8                           | 52                            |
| P4                   | 68                          | 90                            | 66                          | 82                            |
| P5                   | 56                          | 84                            | 68                          | 80                            |
| P6                   | 90                          | 94                            | 88                          | 94                            |
| P7                   | 88                          | 92                            | 94                          | 96                            |
| P8                   | 86                          | 90                            | 96                          | 96                            |
| P9                   | 66                          | 82                            | 66                          | 80                            |
| P11                  | 58                          | 74                            | 72                          | 80                            |
| P12                  | 76                          | 78                            | 60                          | 74                            |
| P13                  | 68                          | 74                            | 54                          | 62                            |
| P14                  | 58                          | 68                            | 70                          | 84                            |
| P15                  | 60                          | 76                            | 72                          | 90                            |
| P16                  | 92                          | 98                            | 96                          | 100                           |
| P18                  | 94                          | 98                            | 96                          | 100                           |
| P19                  | 8                           | 20                            | 8                           | 22                            |
| P20                  | 14                          | 36                            | 18                          | 32                            |
| P23                  | 70                          | 88                            | 86                          | 94                            |
| P25                  | 90                          | 98                            | 92                          | 96                            |
| P26                  | 2                           | 18                            | 2                           | 16                            |
| P27                  | 42                          | 64                            | 64                          | 88                            |
| P28                  | 2                           | 8                             | 0                           | 8                             |

Scores for Each Participant: Rater 3

| <b>Participant #</b> | <b>Time 1 Transcription</b> | <b>Time 1 Multiple Choice</b> | <b>Time 2 Transcription</b> | <b>Time 2 Multiple Choice</b> |
|----------------------|-----------------------------|-------------------------------|-----------------------------|-------------------------------|
| P1                   | 90                          | 100                           | 84                          | 94                            |
| P2                   | 12                          | 44                            | 8                           | 46                            |
| P4                   | 64                          | 90                            | 62                          | 82                            |
| P5                   | 54                          | 80                            | 68                          | 82                            |
| P6                   | 88                          | 96                            | 86                          | 94                            |
| P7                   | 94                          | 98                            | 84                          | 98                            |
| P8                   | 88                          | 92                            | 96                          | 96                            |
| P9                   | 52                          | 72                            | 52                          | 74                            |
| P11                  | 68                          | 84                            | 62                          | 86                            |
| P12                  | 66                          | 82                            | 48                          | 60                            |
| P13                  | 60                          | 74                            | 36                          | 54                            |
| P14                  | 60                          | 78                            | 68                          | 90                            |
| P15                  | 62                          | 80                            | 68                          | 90                            |
| P16                  | 84                          | 96                            | 98                          | 100                           |
| P18                  | 88                          | 100                           | 96                          | 100                           |
| P19                  | 2                           | 20                            | 6                           | 22                            |
| P20                  | 6                           | 38                            | 4                           | 26                            |
| P23                  | 86                          | 98                            | 86                          | 96                            |
| P25                  | 88                          | 96                            | 94                          | 100                           |
| P26                  | 0                           | 32                            | 0                           | 24                            |
| P27                  | 38                          | 62                            | 54                          | 82                            |
| P28                  | 0                           | 8                             | 0                           | 8                             |
