# Supplementary material
Source: publisher figshare collection journal article supplement (https://asha.figshare.com/articles/dataset/_/26972425)
Supplement: Supplementary file 3 [file 1]

### Supplemental Material S3. Summary of differences in raters' intelligibility scores.

#### Post-Treatment Comparisons for Raters 1, 2, and 3

| Post-Treatment  | Mean % Difference R1-R2 | Mean % Difference R1-R3 | Mean % Difference R2-R3 | Mean % Difference Across Raters | SD Difference Across Raters | Min-Max Difference Across Raters |
|-----------------|-------------------------|-------------------------|-------------------------|---------------------------------|-----------------------------|----------------------------------|
| Transcription   |                         |                         |                         |                                 |                             |                                  |
| Time 1          | 5.3                     | 5.5                     | 5.3                     | 5.3                             | 4.5                         | 0-20                             |
| Time 2          | 4.2                     | 5.5                     | 4.9                     | 4.8                             | 4.7                         | 0-18                             |
|                 |                         |                         |                         |                                 |                             |                                  |
| Multiple Choice |                         |                         |                         |                                 |                             |                                  |
| Time 1          | 5.6                     | 4.1                     | 3.9                     | 4.5                             | 4.3                         | 0-22                             |
| Time 2          | 3.3                     | 4.7                     | 3.5                     | 3.8                             | 3.9                         | 0-16                             |

R = Rater

#### Pre- and Post-Treatment Comparisons for Rater 4 versus Averaged Ratings of Raters 1, 2, and 3

| Time & Type of Measurement | Mean % Difference | SD Difference | Min-Max Difference |
|----------------------------|-------------------|---------------|--------------------|
| Pre-Treatment              |                   |               |                    |
| Transcription              | 3.1               | 3.1           | 0-9                |
| Multiple Choice            | 3.9               | 2.1           | .7-9.3             |
|                            |                   |               |                    |
| Post-Treatment             |                   |               |                    |
| Transcription              | 4.4               | 5.6           | 0-22               |
| Multiple Choice            | 3.0               | 3.9           | 0-16.7             |
